# Supplementary material for: Microwave-Assisted Catalytic Synthesis of Bio-Based Copolymers from Waste Cooking Oil
Source: Preprints.org preprint supplement (doi:10.20944/preprints201703.0137.v1), 2017-03-17
Supplement: Supplementary file 1 [file supplementary]

## Electronic Supporting Information (ESI)

# Microwave-assisted catalytic synthesis of bio-based copolymers from waste cooking oil

Mahrzadi Noreen Shahi <sup>1, 2</sup> Muhammad Arshad <sup>1</sup> and Aman Ullah <sup>1,\*</sup>

<sup>1</sup> Affiliation 1; Department of Agricultural, Food and Nutritional Sciences, University of Alberta, Edmonton, AB, Canada.

<sup>2</sup> Affiliation 2; Department of Chemistry, The Islamia University of Bahawalpur, Bahawalpur 63100, Pakistan.

\* Correspondence: ullah2@ualberta.ca ; Tel.: +1 780 492 4845

## Differential Scanning Calorimetry (DSC):

Figure S1 shows the DSC thermograms of 2<sup>nd</sup> heating run of the selected polymers obtained by MW assisted copolymerization. It is evident from thermograms that these biopolymers generally show transitions close to -20°C which could be the glass transitions of these biopolymers. The polymer synthesized using DMAP as co-catalyst entry 3 table 2 clearly displayed two additional peaks, one endothermic peak which could be melting and another exothermic peak which could be due to crystallization.

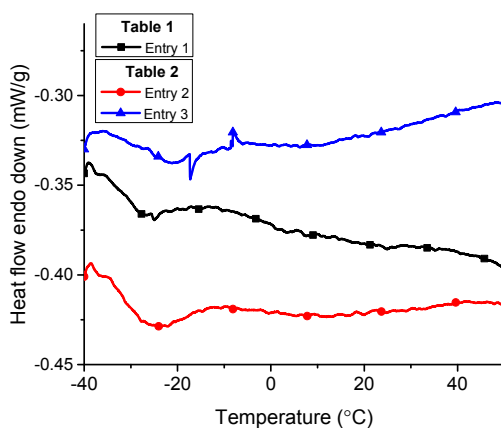

Figure S1: DSC thermograms of selected polyesters table 1, entry 1, and table 2, entry 2, & 3.
